# Supplementary material
Source: Springer Nature journal article supplement (https://www.springermedizin.de/resource/supplementary/12874_2012_888_MOESM4_ESM.pdf/9432716)

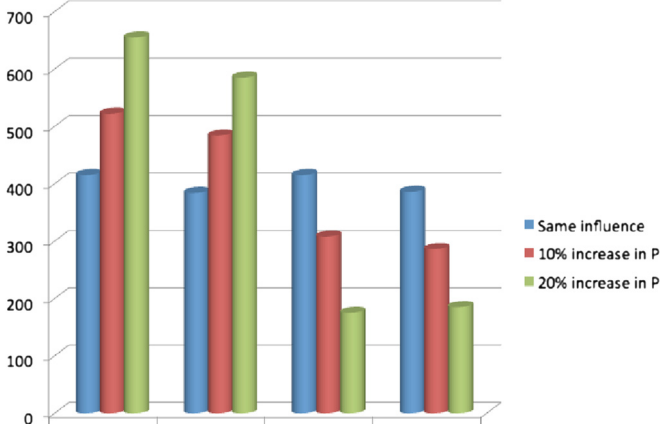

|                   | BH  | PH  | BU  | PU  |
|-------------------|-----|-----|-----|-----|
| Same influence    | 415 | 384 | 415 | 386 |
| 10% increase in P | 522 | 484 | 308 | 286 |
| 20% increase in P | 655 | 585 | 175 | 185 |

Supplement: MOESM4 [file 9432716]
